# Supplementary material
Source: publisher site journal article supplement (https://www.dovepress.com/article/324303)
Supplement: Supplementary file 1 [file 324303-revised-supplementary-figure-1.pdf › 324303-revised-supplementary-figure-1.pdf]

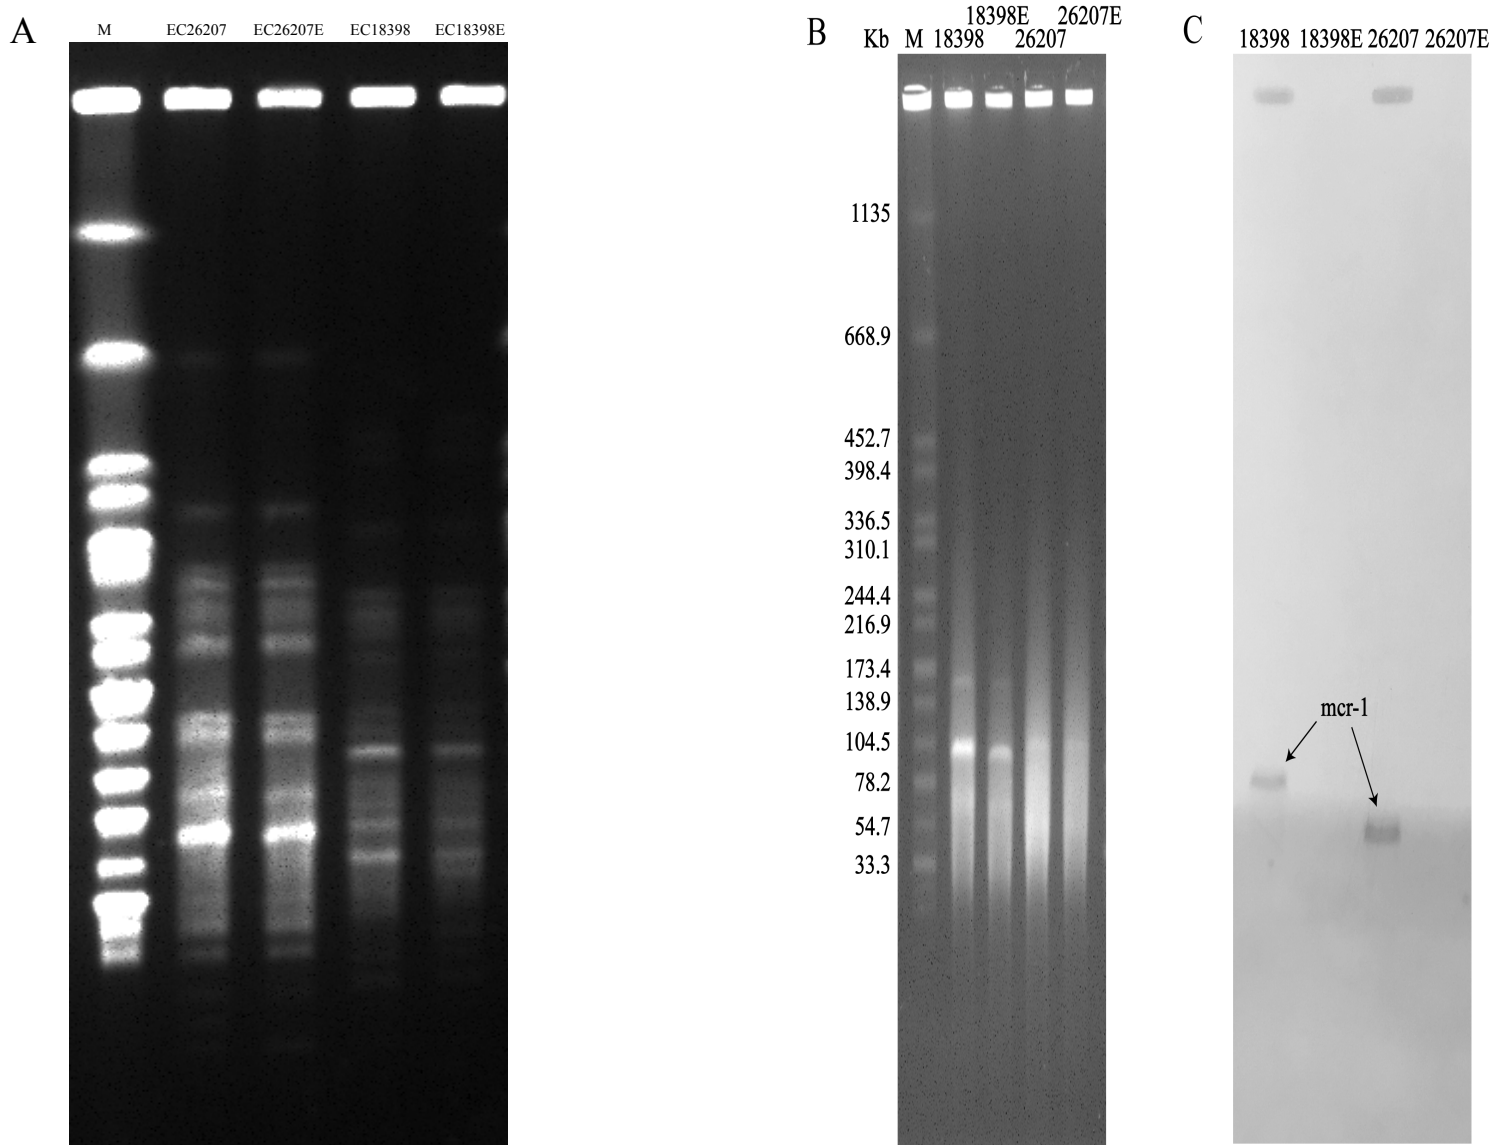

Figure S1. (A) The dendrogram of PFGE patterns of . (B) Plasmid profiles of parental and plasmid-curing isolates generated using the restriction enzyme S1, with *Salmonella enterica* serovar Branderup as the molecular mass marker. (C). Southern blot hybridization with a *mcr-I*-specific probe. The MCR-F1 (5'-TGCAGCATACTTCTGTGTGGT-3') and MCR-R1 (5'-CACCG-AGTAGATTGGCATGA-3') primers were used.
